# Supplementary material for: Correlated biphasic features of improved rate capability upon Ga doping in LiNi0.6Mn0.2Co0.2O2
Source: Royal Society of Chemistry journal article supplement (doi:10.1039/d1ta05676j), 2021-01-01
Supplement: d1ta05676j1.pdf [file d1ta05676j1.pdf]

Supplementary Information for “Correlated biphasic features of  
the improved rate capability upon Ga doping in

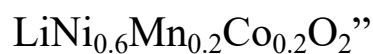

Jie Li<sup>1</sup>, Zhimin Li<sup>1,1</sup>, Maolin Zhang<sup>1</sup>, Yangxi Yan<sup>1</sup>, Dongyan Zhang<sup>1,2</sup>, Pangpang

Wang<sup>2</sup>, Ri-ichi Murakami<sup>3</sup>

<sup>1</sup>School of Advanced Materials and Nanotechnology, Xidian University, Xi'an 710126,  
P. R. China

<sup>2</sup>Nanomaterials Group, Institute of System, Information Technologies and  
Nanotechnologies (ISIT), Fukuoka Industry-Academia Symphonicity (FiaS), 4-1  
Kyudaishinmachi, Nishi-ku, Fukuoka 819-0388, Japan

<sup>3</sup>School of Mechanical Engineering, Chengdu University, Chengdu 610106, P. R.  
China

---

1 [zmli@mail.xidian.edu.cn](mailto:zmli@mail.xidian.edu.cn)

2 [zhangdongyan@xidian.edu.cn](mailto:zhangdongyan@xidian.edu.cn)

Table S1. 100 cycle capacity retention of NCM622 with and without Ga doping in the voltage range of 2.7-4.5 V

| Ga content | 0%     | 0.5%   | 1%     | 3%     |
|------------|--------|--------|--------|--------|
| Retention  | 68.47% | 66.91% | 80.46% | 80.82% |

Table S2. 100 cycle capacity retention of NCM622 with and without Ga doping in the voltage range of 3.5-4.3 V

| Ga content | 0%     | 0.5%   | 1%     | 3%     |
|------------|--------|--------|--------|--------|
| Retention  | 72.97% | 90.09% | 92.36% | 91.41% |

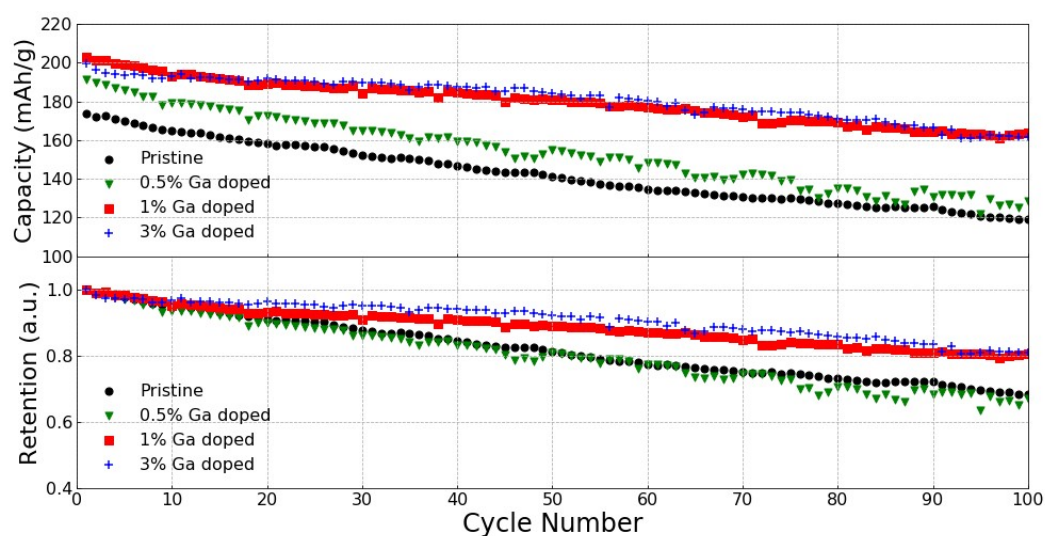

Figure S1. (a) Cyclic discharge capacity, (b) capacity retention, at 1 C of Ga doped and undoped NCM622 in the voltage range of 2.7-4.5 V.

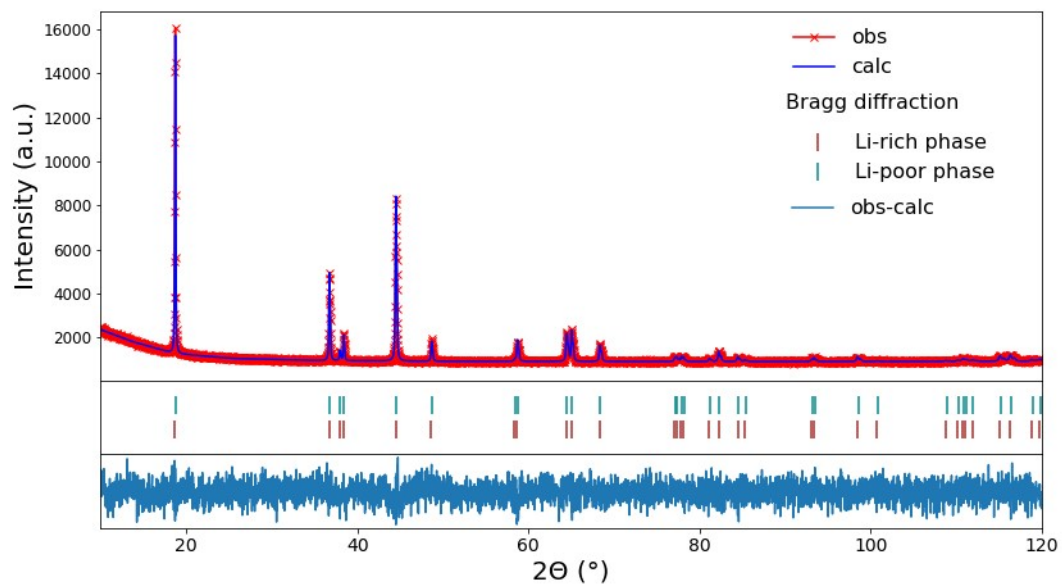

Figure S2. Rietveld refinement of XRD pattern for NCM622 without Ga doping.

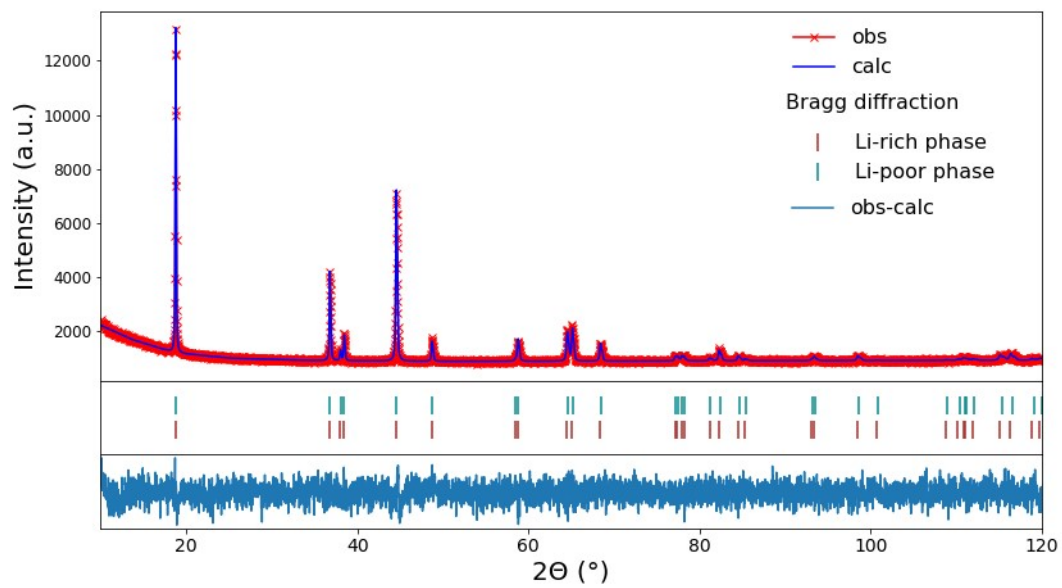

Figure S3. Rietveld refinement of XRD pattern for NCM622 with 0.5% Ga doping.

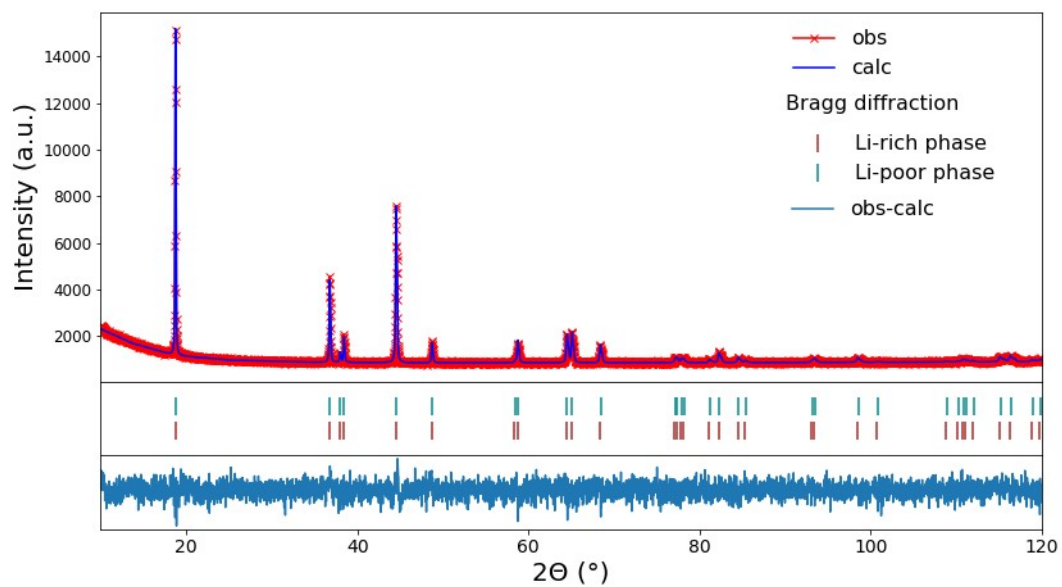

Figure S4. Rietveld refinement of XRD pattern for NCM622 with 1% Ga doping.

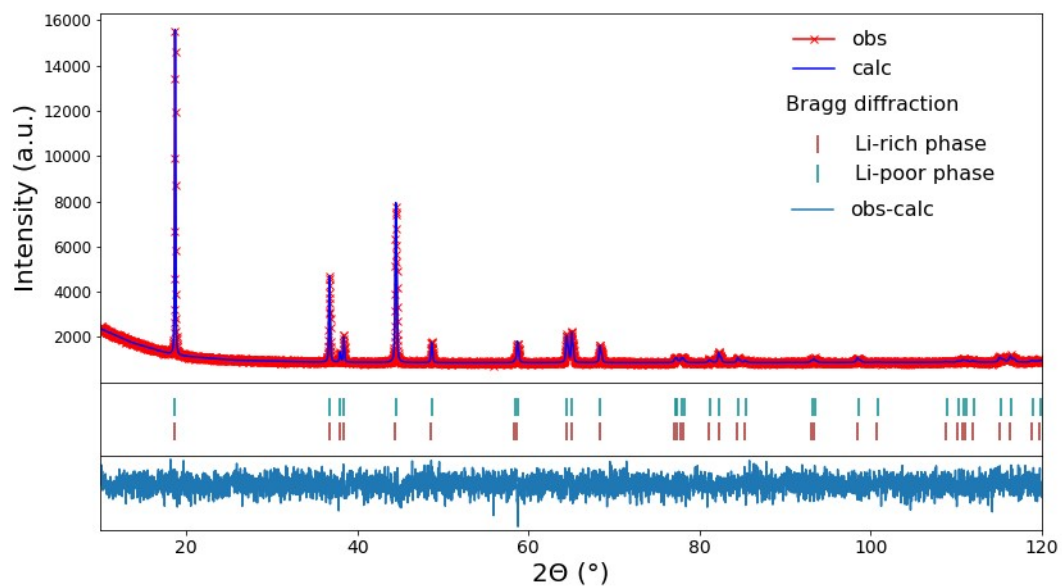

Figure S5. Rietveld refinement of XRD pattern for NCM622 without Ga doping.

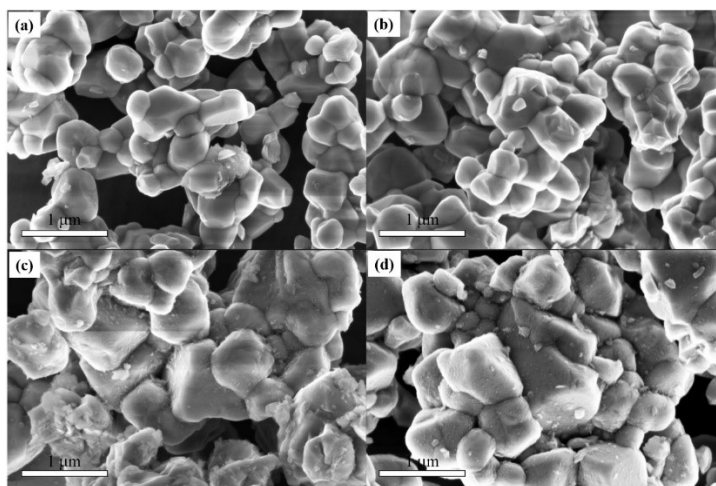

Figure S6. SEM micrographs of (a) 0%, (b) 0.5%, (c) 1%, (d) 3% Ga doped NCM622.

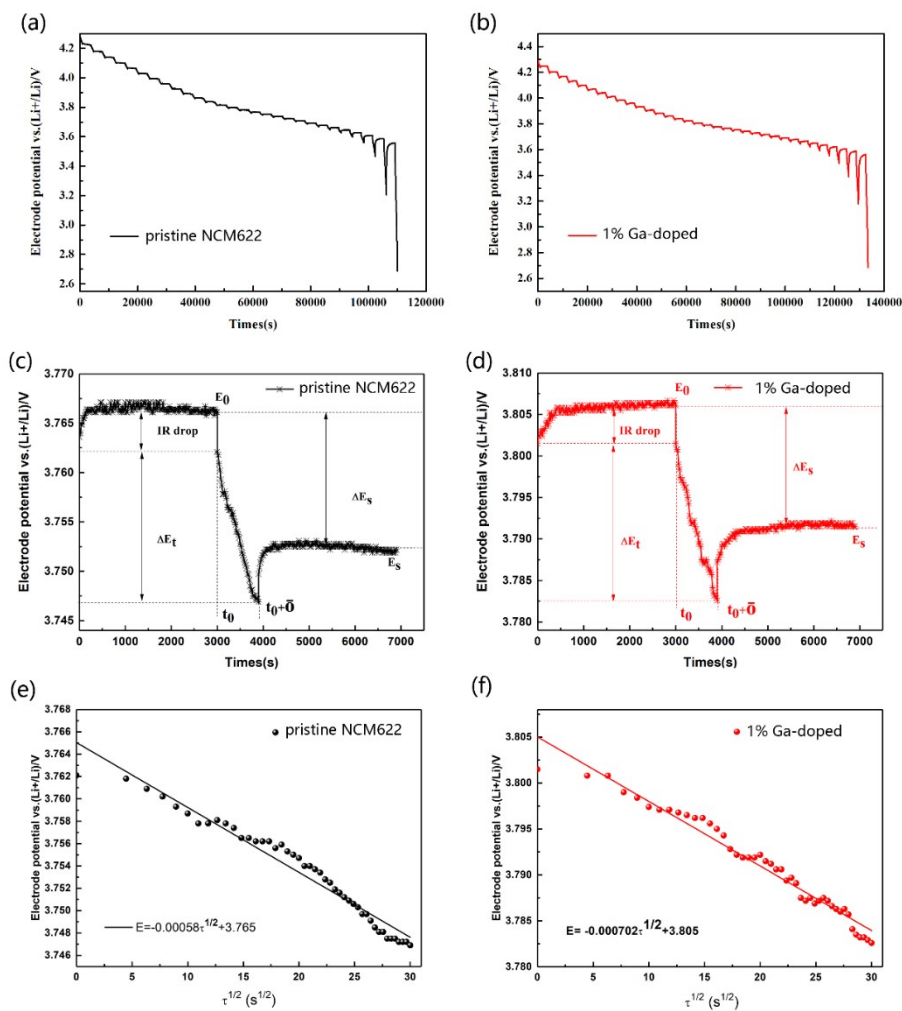

Figure S7. (a-b) GITT curves for the discharge of the prepared samples, (c-d) applied current plus vs cell voltage for a single titration step of GITT curves, (e-f) linear fit of the cell voltage as a function of the square root of time ( $\tau^{1/2}$ ) with different pulse current.

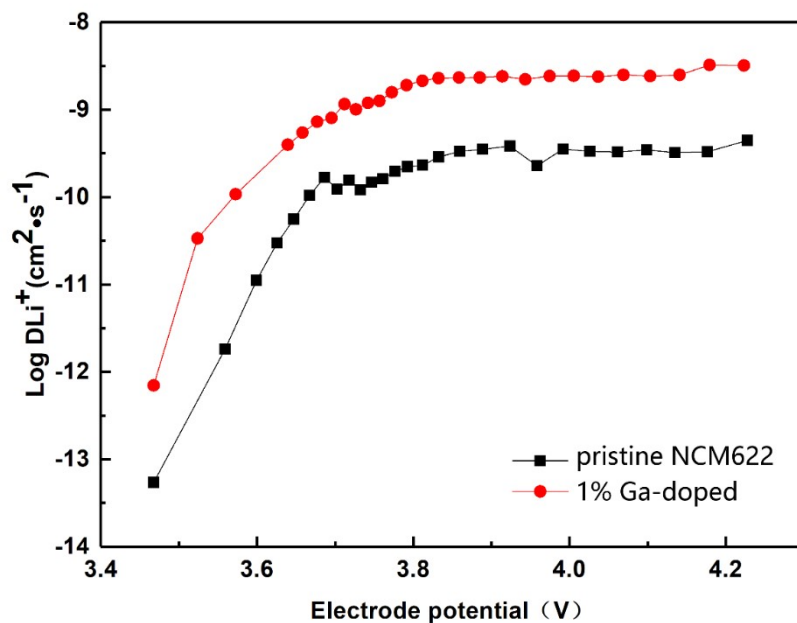

Figure S8. The chemical diffusion coefficient of  $\text{Li}^+$  as function of potential for NCM622 with and without Ga doping during discharge process.

Table S3. Calculated diffusion coefficient from EIS for NCM622 with and without Ga doping.

| Ga content | Diffusion coefficient ( $\text{cm}^2/\text{s}$ ) |                        |
|------------|--------------------------------------------------|------------------------|
|            | Before cycling                                   | After 100 cycles       |
| 0%         | $1.28 \times 10^{-9}$                            | $6.31 \times 10^{-10}$ |
| 1%         | $1.567 \times 10^{-9}$                           | $9.48 \times 10^{-10}$ |
